# Supplementary material for: Endorsement of PRISMA statement and quality of systematic reviews and meta-analyses published in nursing journals: a cross-sectional study
Source: PubMed Central journal article supplement — BMJ Open. 2017 Feb 7;7(2):e013905. doi: 10.1136/bmjopen-2016-013905 (PMC5306529; doi:10.1136/bmjopen-2016-013905), 2017-02-07
Supplement: bmjopen-2016-013905supp_table1-journals.pdf [file bmjopen-2016-013905supp_table1-journals.pdf]

| <b>Number</b> | <b>Full Journal Title</b>                                                                      |
|---------------|------------------------------------------------------------------------------------------------|
| 1             | AAOHN JOURNAL                                                                                  |
| 2             | Acta Paulista de Enfermagem                                                                    |
| 3             | ADVANCES IN NURSING SCIENCE                                                                    |
| 4             | Advances in Skin & Wound Care                                                                  |
| 5             | AMERICAN JOURNAL OF CRITICAL CARE                                                              |
| 6             | AMERICAN JOURNAL OF NURSING                                                                    |
| 7             | APPLIED NURSING RESEARCH                                                                       |
| 8             | Aquichan                                                                                       |
| 9             | ARCHIVES OF PSYCHIATRIC NURSING                                                                |
| 10            | Asian Nursing Research                                                                         |
| 11            | Assistenza Infermieristica e Ricerca                                                           |
| 12            | Australian Critical Care                                                                       |
| 13            | Australian Journal of Advanced Nursing                                                         |
| 14            | Australian Journal of Rural Health                                                             |
| 15            | Bariatric Nursing and Surgical Patient Care                                                    |
| 16            | Biological Research for Nursing                                                                |
| 17            | BIRTH-ISSUES IN PERINATAL CARE                                                                 |
| 18            | CANCER NURSING                                                                                 |
| 19            | CIN-COMPUTERS INFORMATICS NURSING                                                              |
| 20            | Clinical Journal of Oncology Nursing                                                           |
| 21            | Clinical Nurse Specialist                                                                      |
| 22            | Clinical Nursing Research                                                                      |
| 23            | Collegian                                                                                      |
| 24            | Contemporary Nurse                                                                             |
| 25            | Critical Care Nurse                                                                            |
| 26            | Critical Care Nursing Clinics of North America                                                 |
| 27            | EUROPEAN JOURNAL OF CANCER CARE                                                                |
| 28            | European Journal of Cardiovascular Nursing                                                     |
| 29            | European Journal of Oncology Nursing                                                           |
| 30            | Gastroenterology Nursing                                                                       |
| 31            | GERIATRIC NURSING                                                                              |
| 32            | HEART & LUNG                                                                                   |
| 33            | Holistic Nursing Practice                                                                      |
| 34            | International Emergency Nursing                                                                |
| 35            | International Journal of Mental Health Nursing                                                 |
| 36            | International Journal of Nursing Knowledge                                                     |
| 37            | International Journal of Nursing Practice                                                      |
| 38            | INTERNATIONAL JOURNAL OF NURSING STUDIES<br>International Journal of Nursing Terminologies and |
| 39            | Classifications                                                                                |
| 40            | INTERNATIONAL NURSING REVIEW<br>JANAC-JOURNAL OF THE ASSOCIATION OF NURSES IN                  |
| 41            | AIDS CARE                                                                                      |
| 42            | Japan Journal of Nursing Science                                                               |

|    |                                                                                                |
|----|------------------------------------------------------------------------------------------------|
| 43 | JOGNN-JOURNAL OF OBSTETRIC GYNECOLOGIC AND NEONATAL NURSING                                    |
| 44 | Journal for Specialists in Pediatric Nursing                                                   |
| 45 | Journal of Addictions Nursing                                                                  |
| 46 | JOURNAL OF ADVANCED NURSING                                                                    |
| 47 | Journal of Cardiovascular Nursing                                                              |
| 48 | Journal of Child Health Care                                                                   |
| 49 | JOURNAL OF CLINICAL NURSING                                                                    |
| 50 | Journal of Community Health Nursing                                                            |
| 51 | JOURNAL OF CONTINUING EDUCATION IN NURSING                                                     |
| 52 | Journal of Emergency Nursing                                                                   |
| 53 | Journal of Family Nursing                                                                      |
| 54 | Journal of Gerontological Nursing                                                              |
| 55 | Journal of Hospice & Palliative Nursing                                                        |
| 56 | JOURNAL OF HUMAN LACTATION                                                                     |
| 57 | Journal of Korean Academy of Nursing                                                           |
| 58 | JOURNAL OF MIDWIFERY & WOMENS HEALTH                                                           |
| 59 | JOURNAL OF NEUROSCIENCE NURSING                                                                |
| 60 | JOURNAL OF NURSING ADMINISTRATION                                                              |
| 61 | JOURNAL OF NURSING CARE QUALITY                                                                |
| 62 | JOURNAL OF NURSING EDUCATION                                                                   |
| 63 | Journal of Nursing Management                                                                  |
| 64 | Journal of Nursing Research                                                                    |
| 65 | JOURNAL OF NURSING SCHOLARSHIP                                                                 |
| 66 | Journal of Pediatric Health Care<br>Journal of Pediatric Nursing-Nursing Care of Children &    |
| 67 | Families                                                                                       |
| 68 | Journal of Pediatric Oncology Nursing                                                          |
| 69 | Journal of PeriAnesthesia Nursing                                                              |
| 70 | JOURNAL OF PERINATAL & NEONATAL NURSING                                                        |
| 71 | JOURNAL OF PROFESSIONAL NURSING                                                                |
| 72 | Journal of Psychiatric and Mental Health Nursing<br>JOURNAL OF PSYCHOSOCIAL NURSING AND MENTAL |
| 73 | HEALTH SERVICES                                                                                |
| 74 | Journal of School Nursing                                                                      |
| 75 | Journal of the American Academy of Nurse Practitioners                                         |
| 76 | Journal of Tissue Viability                                                                    |
| 77 | Journal of Transcultural Nursing                                                               |
| 78 | Journal of Wound Ostomy and Continence Nursing                                                 |
| 79 | MCN-The American Journal of Maternal-Child Nursing                                             |
| 80 | MIDWIFERY                                                                                      |
| 81 | Nephrology Nursing Journal                                                                     |
| 82 | NURSE EDUCATION TODAY                                                                          |
| 83 | Nurse Educator                                                                                 |
| 84 | Nursing & Health Sciences                                                                      |

---

|     |                                          |
|-----|------------------------------------------|
| 85  | NURSING CLINICS OF NORTH AMERICA         |
| 86  | NURSING ETHICS                           |
| 87  | Nursing in Critical Care                 |
| 88  | Nursing Inquiry                          |
| 89  | NURSING OUTLOOK                          |
| 90  | Nursing Philosophy                       |
| 91  | NURSING RESEARCH                         |
| 92  | NURSING SCIENCE QUARTERLY                |
| 93  | ONCOLOGY NURSING FORUM                   |
| 94  | Orthopaedic Nursing                      |
| 95  | Pain Management Nursing                  |
| 96  | PERSPECTIVES IN PSYCHIATRIC CARE         |
| 97  | Pflege                                   |
| 98  | PUBLIC HEALTH NURSING                    |
| 99  | Rehabilitation Nursing                   |
| 100 | Research and Theory for Nursing Practice |
| 101 | Research in Gerontological Nursing       |
| 102 | RESEARCH IN NURSING & HEALTH             |
| 103 | Revista da Escola de Enfermagem da USP   |
| 104 | WESTERN JOURNAL OF NURSING RESEARCH      |
| 105 | Women and Birth                          |
| 106 | Workplace Health & Safety                |
| 107 | Worldviews on Evidence-Based Nursing     |

---
