# Supplementary material for: Endorsement of PRISMA statement and quality of systematic reviews and meta-analyses published in nursing journals: a cross-sectional study
Source: PubMed Central journal article supplement — BMJ Open. 2017 Feb 7;7(2):e013905. doi: 10.1136/bmjopen-2016-013905 (PMC5306529; doi:10.1136/bmjopen-2016-013905), 2017-02-07
Supplement: bmjopen-2016-013905supp_table2-articles.pdf [file bmjopen-2016-013905supp_table2-articles.pdf]

**Articles in PRIMSA journals**

| <b>First Author</b> | <b>Title of the paper</b>                                                                                                                                                                            | <b>Journal</b>                                             | <b>Vol: Pages</b> |
|---------------------|------------------------------------------------------------------------------------------------------------------------------------------------------------------------------------------------------|------------------------------------------------------------|-------------------|
| Abed                | Healthcare needs of older Arab migrants: a systematic review                                                                                                                                         | Journal of Clinical Nursing                                | 23: 13-14         |
| Avery               | A Systematic Review of Maternal Confidence for Physiologic Birth: Characteristics of Prenatal Care and Confidence Measurement                                                                        | Journal of Midwifery & Women's Health                      | 59: 586-595       |
| Booker              | African Americans' Perceptions of Pain and Pain Management: A Systematic Review                                                                                                                      | Journal of Transcultural Nursing                           | 27: 73-80         |
| Boss                | Endogenous Sex Hormones and Cognitive Function in Older Adults: A Systematic Review                                                                                                                  | Western Journal of Nursing Research                        | 36: 388-426       |
| Calderon            | A Systematic Review of Oral Health Behavior Research in American Adolescents                                                                                                                         | The Journal of School Nursing                              | 30: 396-403       |
| Chen                | The Effectiveness of Acupressure on Relieving Pain: A Systematic Review                                                                                                                              | Pain Management Nursing                                    | 15: 535-550       |
| Coolbrandt          | Characteristics and effectiveness of complex nursing interventions aimed at reducing symptom burden in adult patients treated with chemotherapy: A systematic review of randomized controlled trials | International Journal of Nursing Studies                   | 51: 495-510       |
| Copanitsanou        | Effects of education of paediatric patients undergoing elective surgical procedures on their anxiety – a systematic review                                                                           | Journal of Clinical Nursing                                | 23: 940-954       |
| Cornélio            | Measuring instruments in cardiology adapted into Portuguese language of Brazil: a systematic review                                                                                                  | Rev Esc Enferm USP                                         | 48: 362-370       |
| Cunen               | A systematic review of midwife-led interventions to address post partum post-traumatic stress                                                                                                        | Midwifery                                                  | 30: 170-184       |
| Gielen              | The effects of nurse prescribing: a systematic review                                                                                                                                                | International Journal of Nursing Studies                   | 51: 1048-1061     |
| Eidhammer           | User involvement in structured violence risk management within forensic mental health facilities – a systematic literature                                                                           | Journal of Clinical Nursing                                | 23: 2716-2724     |
| Feng                | Breastfeeding and the Risk of Ovarian Cancer: A Meta-Analysis                                                                                                                                        | Journal of Midwifery & Women's Health                      | 59: 428-437       |
| Fu                  | Putting Evidence Into Practice: Cancer-Related Lymphedema Evolving Evidence for Treatment and Management From 2009–2014                                                                              | Clinical Journal of Oncology Nursing                       | 18 Supp: 68       |
| Giles               | Qualitative systematic review the unique experiences of the nurse-family member when a loved one is admitted with a critical illness                                                                 | JOURNAL OF ADVANCED NURSING                                | 70: 1451-1464     |
| Happell             | A systematic review of nurse physical healthcare for consumers utilizing mental health services                                                                                                      | Journal of Psychiatric and Mental Health Nursing           | 21: 11-22         |
| Harrison            | The contribution of nurses to incident disclosure: A narrative review                                                                                                                                | International Journal of Nursing Studies                   | 51: 334-345       |
| Hoang               | Women's maternity care needs and related service models in rural areas: A comprehensive systematic review of qualitative evidence                                                                    | Women and Birth                                            | 27: 233-241       |
| Hoga                | Adult men's beliefs, values, attitudes and experiences regarding contraceptives: a systematic review of qualitative studies                                                                          | Journal of clinical nursing                                | 23: 927-939       |
| Hwu                 | Effectiveness of Propolis on Oral Health: A Meta-Analysis                                                                                                                                            | The Journal of Nursing Research                            | 22: 221-229       |
| Kangasniemi         | Towards environmentally responsible nursing: a critical interpretive synthesis                                                                                                                       | Journal of advanced nursing                                | 70: 1465-1478     |
| Kim                 | Relationship of trauma centre characteristics and patient outcomes: a systematic review                                                                                                              | Journal of Clinical Nursing                                | 23: 301-314       |
| Lefebvre            | The effect of breastfeeding on childhood overweight and obesity: A systematic review of the literature                                                                                               | Journal of the American Association of Nurse Practitioners | 26: 386-401       |
| Missen              | Satisfaction of newly graduated nurses enrolled in transition-to-practice programmes in their first year of employment: a systematic review                                                          | Journal of advanced nursing                                | 70: 2419-2433     |
| Mohammady           | Early ambulation after diagnostic transfemoral catheterisation: A systematic review and meta-analysis                                                                                                | International Journal of Nursing Studies                   | 51: 39-50         |
| Murphy              | Interventions to minimise the initial use of indwelling urinary catheters in acute care: A systematic review                                                                                         | International Journal of Nursing Studies                   | 51: 4-13          |
| Park                | Effects of exercise programs on depressive symptoms, quality of life, and self-esteem in older people: A systematic review of randomized controlled trials                                           | Applied Nursing Research                                   | 27: 219-226       |
| Peacock             | A review of interventions to prevent Type 2 Diabetes after Gestational Diabetes                                                                                                                      | Women and Birth                                            | 27: e7-e15        |
| Quelly              | Childhood obesity prevention: a review of school nurse perceptions and practices                                                                                                                     | Journal for Specialists in Pediatric Nursing               | 19: 198-209       |
| Rainforth           | A literature review of Case Formulation to inform Mental Health practice                                                                                                                             | Journal of Psychiatric and Mental Health Nursing           | 21: 206-213       |
| Ribeiro             | Health facility environment as humanization strategy care in the pediatric unit: systematic review                                                                                                   | Rev Esc Enferm USP                                         | 48: 527-536       |
| Tan                 | Effectiveness of multidisciplinary interventions to improve the quality of life for people with Parkinson's disease: A systematic review                                                             | International Journal of Nursing Studies                   | 51: 166-174       |
| Temple              | A systematic review of interventions to promote physical activity in the preschool setting                                                                                                           | Journal for Specialists in Pediatric Nursing               | 19: 274-284       |
| Timlin              | A systematic narrative review of the literature: adherence to pharmacological and nonpharmacological treatments among adolescents with mental disorders                                              | Journal of clinical nursing                                | 23: 3321-3334     |
| Varallo             | Causes for the underreporting of adverse drug events by health professionals: a systematic review                                                                                                    | Rev Esc Enferm USP                                         | 48: 739-747       |
| Westermann          | Burnout intervention studies for inpatient elderly care nursing staff: Systematic literature review                                                                                                  | International Journal of Nursing Studies                   | 53: 63-71         |
| Wilkinson           | Factors influencing the ability to self-manage diabetes for adults living with type 1 or 2 diabetes                                                                                                  | International Journal of Nursing Studies                   | 51: 111           |

**Articles in non-PRIMSA journals**

| <b>First Author</b> | <b>Title of the paper</b>                                                                                                                 | <b>Journal</b>                             | <b>Vol: Pages</b> |
|---------------------|-------------------------------------------------------------------------------------------------------------------------------------------|--------------------------------------------|-------------------|
| Abdullah            | Measuring the Effectiveness of Mentoring as a Knowledge Translation Intervention for Implementing Empirical Evidence: A Systematic Review | Worldviews on Evidence-Based Nursing       | 11: 284-300       |
| Ali                 | Patient Preference Regarding their Role in Clinical Decision Making Process: A Systematic Review                                          | International Journal of Nursing Education | 6: 122-124        |

|                  |                                                                                                                                                                                                                                                                                     |                                           |                      |
|------------------|-------------------------------------------------------------------------------------------------------------------------------------------------------------------------------------------------------------------------------------------------------------------------------------|-------------------------------------------|----------------------|
| Al-Zaiti         | Electrocardiogram-based predictors of clinical outcomes: A meta-analysis of the prognostic value of ventricular repolarization                                                                                                                                                      | Heart & Lung                              | 43: 516-526          |
| Badeaux          | A Systematic Review of the Effectiveness of Intravenous Tranexamic Acid Administration in Managing Perioperative Blood Loss in Patients Undergoing Spine Surgery                                                                                                                    | American Society of PeriAnesthesia Nurses | 29: 459-465          |
| Bae              | Assessing the relationships between nurse work hours/ overtime and nurse and patient outcomes: Systematic literature review                                                                                                                                                         | Nursing Outlook                           | 62: 138-156          |
| Leslie Blair     | Device Diagnostics and Early Identification of Acute Decompensated Heart Failure A Systematic Review                                                                                                                                                                                | Journal of Cardiovascular Nursing         | 29: 68-81            |
| Blay             | A systematic review of time studies to assess the impact of patient transfers on nurse workload                                                                                                                                                                                     | International Journal of Nursing Practice | 20: 662-673          |
| Burnsall         | The Relationship Between Physical Activity and Depressive Symptoms in Adolescents: A Systematic Review                                                                                                                                                                              | Worldviews on Evidence-Based Nursing      | 11: 376-382          |
| Connett          | Intimate Partner Abuse Among Older Women: Qualitative Systematic Review                                                                                                                                                                                                             | Clinical Nursing Research                 | 23: 664-683          |
| O'Connor         | Chronic Venous Leg Ulcers: Is Topical Zinc the Answer? A Review of the Literature                                                                                                                                                                                                   | Advances in Skin & Wound Care             | 27: 35-44            |
| Cramer           | A systematic review and meta-analysis of exercise interventions for colorectal cancer patients                                                                                                                                                                                      | European Journal of Cancer Care           | 23: 3-14             |
| Deckx            | Risk factors for loneliness in patients with cancer: A systematic literature review and meta-analysis                                                                                                                                                                               | European Journal of Oncology Nursing      | 18: 466-477          |
| Duran            | Effects of Leukoreduction and Premedication With Acetaminophen and Diphenhydramine in Minimizing Febrile Nonhemolytic Transfusion Reactions and Allergic Transfusion Reactions During and After Blood Product Administration: A Literature Review With Recommendations for Practice | Journal of Pediatric Oncology Nursing     | 31: 223-229          |
| Engwall          | Let There Be Light And Darkness Findings From a Prestudy Concerning Cycled Light in the Intensive Care Unit Environment                                                                                                                                                             | Critical Care Nursing Quarterly           | 3: 273- 298          |
| Enskar           | A Swedish perspective on nursing and psychosocial research in paediatric oncology: A literature review                                                                                                                                                                              | European Journal of Oncology Nursing      | 19: 310-317          |
| Fernbach         | Evidence-Based Recommendations for Fertility Preservation Options for Inclusion in Treatment Protocols for Pediatric and Adolescent Patients Diagnosed With Cancer                                                                                                                  | Journal of Pediatric Oncology Nursing     | 31: 211-222          |
| Giglia           | The Effectiveness of the Internet in Improving Breastfeeding Outcomes: A Systematic Review                                                                                                                                                                                          | Journal of Human Lactation                | 30: 156-160          |
| Han              | Measuring Self-care in Patients With Hypertension A Systematic Review of Literature                                                                                                                                                                                                 | Journal of Cardiovascular Nursing         | 29: 55-67            |
| Handberg         | Men's reflections on participating in cancer rehabilitation: a systematic review of qualitative studies 2000–2013                                                                                                                                                                   | European Journal of Cancer Care           | 23: 159-172          |
| HOLM             | Effective nursing leadership of older persons in the community –a systematic review                                                                                                                                                                                                 | Journal of Nursing Management             | 22: 211-224          |
| Huang            | Ethical and methodological issues in qualitative health research involving children: A systematic review                                                                                                                                                                            | Nursing Ethics                            | 2014: 1-18<br>Online |
| Jung             | A fall prevention guideline for older adults living in long-term care facilities: fall guidelines                                                                                                                                                                                   | International Nursing Review              | 61: 525-533          |
| Kenderiank       | Ostomies in rectal cancer patients: what is their psychosocial impact?                                                                                                                                                                                                              | European Journal of Cancer Care           | 23: 328-332          |
| Manning          | Long-term psychosocial impact reported by childhood critical illness survivors: a systematic review                                                                                                                                                                                 | Nursing in Critical Care                  | 19: 145-156          |
| McAlvin          | Family presence during resuscitation and invasive procedures in pediatric critical care: a systematic review                                                                                                                                                                        | American Journal of Critical Care         | 23: 477-485          |
| O'Keefe-McCarthy | Impact of Prodromal Symptoms on Future Adverse Cardiac-Related Events: A Systematic Review                                                                                                                                                                                          | Journal of Cardiovascular Nursing         | 31: E1-E10           |
| Montalvo         | Participant Comprehension of Research for Which They Volunteer: A Systematic Review                                                                                                                                                                                                 | Journal of Nursing Scholarship            | 46: 423-431          |
| Purath           | Motivational interviewing for older adults in primary care: A systematic review                                                                                                                                                                                                     | Geriatric Nursing                         | 35: 219-224          |
| Riddle           | Intraoperative Brain Activity Monitoring and Postanesthesia Care Unit Length of Stay: Results of a Systematic Review                                                                                                                                                                | Journal of PeriAnesthesia Nursing         | 29: 475-479          |
| Robb             | A Review of Supportive Care Interventions to Manage Distress in Young Children With Cancer and Parents                                                                                                                                                                              | Cancer Nursing                            | 37: E1-E26           |
| Ruggiero         | Effects of Napping on Sleepiness and Sleep-Related Performance Deficits in Night-Shift Workers: A Systematic Review                                                                                                                                                                 | Biological Research for Nursing           | 16: 134-142          |
| Saber            | Frontline registered nurse job satisfaction and predictors over three decades: A meta-analysis from 1980 to 2009                                                                                                                                                                    | Nursing Outlook                           | 62: 402-414          |
| Lottes-Stewart   | Nutrition Support Protocols and Their Influence on the Delivery of Enteral Nutrition: A Systematic Review                                                                                                                                                                           | Worldviews on Evidence-Based Nursing      | 11: 194-199          |
| Tailakh          | Hypertension prevalence, awareness, and control in Arab countries: A systematic review                                                                                                                                                                                              | Nursing and Health Sciences               | 16: 126-130          |
| Todd             | Stressors, Stress Response, and Cancer Recurrence A Systematic Review                                                                                                                                                                                                               | Cancer Nursing                            | 37: 114-125          |
| Yin              | Comparison of fast track protocol and standard care in patients undergoing elective open colorectal resection: a meta-analysis update                                                                                                                                               | Applied Nursing Research                  | 27: e20-e26          |
| Zhou             | The Effects of Amino Acid Infusions on Core Body Temperature During the Perioperative Period: A Systematic Review                                                                                                                                                                   | Journal of PeriAnesthesia Nursing         | 29: 491-500          |
